# Supplementary material for: Health information use and associated factors among healthcare professionals in Ilu Aba Bor zone, Oromia region, Ethiopia: an institution-based cross-sectional study
Source: HighWire-hosted journal article supplement (doi:10.1136/bmjopen-2022-067540), 2023-03-01
Supplement: bmjopen-2022-067540supp001_data_supplement.pdf [file bmjopen-2022-067540supp001_data_supplement.pdf]

**Questionnaire prepared to assess health information utilization and associated factors**

| <b>Part one: Socio demographic characteristics</b>                                                                                           |                                                                                                                                                                                                                                       |
|----------------------------------------------------------------------------------------------------------------------------------------------|---------------------------------------------------------------------------------------------------------------------------------------------------------------------------------------------------------------------------------------|
| 1. Age (in completed years) _____                                                                                                            |                                                                                                                                                                                                                                       |
| 2. Sex                                                                                                                                       | <input type="checkbox"/> Male <input type="checkbox"/> Female                                                                                                                                                                         |
| 3. Marital status                                                                                                                            | <input type="checkbox"/> Never married <input type="checkbox"/> Married                                                                                                                                                               |
| 4. Level of education                                                                                                                        | <input type="checkbox"/> Diploma <input type="checkbox"/> BSc <input type="checkbox"/> Master <input type="checkbox"/> Other, Specify ____                                                                                            |
| 5. Profession                                                                                                                                | <input type="checkbox"/> Health officer <input type="checkbox"/> Nurse <input type="checkbox"/> Midwife <input type="checkbox"/> Pharmacy <input type="checkbox"/> Laboratory<br><input type="checkbox"/> Other, please specify _____ |
| 6. Total service year (in years) _____                                                                                                       |                                                                                                                                                                                                                                       |
| 7. Monthly salary (in ETB) _____                                                                                                             |                                                                                                                                                                                                                                       |
| <b>Part two: Organizational Factors</b>                                                                                                      |                                                                                                                                                                                                                                       |
| 8. Do you take on job training on utilization of health information in your institution?                                                     | <input type="checkbox"/> Yes <input type="checkbox"/> No                                                                                                                                                                              |
| 9. Is there daily recording system for the activities?                                                                                       | <input type="checkbox"/> Yes <input type="checkbox"/> No                                                                                                                                                                              |
| 10. Do you have standardized set of indicators in your working office?                                                                       |                                                                                                                                                                                                                                       |
| 11. In your institution, have you displayed health indicator targets?                                                                        | <input type="checkbox"/> Yes <input type="checkbox"/> No                                                                                                                                                                              |
| 12. Have you discuss the monthly performance progress using the standard indicators?                                                         | <input type="checkbox"/> Yes <input type="checkbox"/> No                                                                                                                                                                              |
| 13. Is the tool for data collection correctly and completely filled by the health professionals always?<br>(check the answer by observation) | <input type="checkbox"/> Yes <input type="checkbox"/> No                                                                                                                                                                              |
| 14. Have you change the collected data into information in your department? (Check by observation)                                           | <input type="checkbox"/> Yes <input type="checkbox"/> No                                                                                                                                                                              |

| <b>15.</b> Have you reported the collected data in the last three months? (check the answer by observation) <input type="checkbox"/> Yes <input type="checkbox"/> No                                                                                                     |                                                                                                                                 |          |   |   |   |   |
|--------------------------------------------------------------------------------------------------------------------------------------------------------------------------------------------------------------------------------------------------------------------------|---------------------------------------------------------------------------------------------------------------------------------|----------|---|---|---|---|
| <b>16.</b> Your facility has data quality check system? <input type="checkbox"/> Yes <input type="checkbox"/> No                                                                                                                                                         |                                                                                                                                 |          |   |   |   |   |
| <b>17.</b> Does your organization have regular meeting to improve health information utilization?<br><input type="checkbox"/> Yes <input type="checkbox"/> No                                                                                                            |                                                                                                                                 |          |   |   |   |   |
| <b>18.</b> Have you receive regular feedback on your report? <input type="checkbox"/> Yes <input type="checkbox"/> No                                                                                                                                                    |                                                                                                                                 |          |   |   |   |   |
| <b>Part three : Health information use</b>                                                                                                                                                                                                                               |                                                                                                                                 |          |   |   |   |   |
| <i>Please indicate your level of agreement on the following statements regarding the utilization of health information. The statements are expressed using the Likert scale; 1-Strongly Disagree, 2 Disagree, 3-Neither Agree or Disagree, 4-Agree 5-Strongly agree.</i> |                                                                                                                                 |          |   |   |   |   |
| Code                                                                                                                                                                                                                                                                     | Health information used for :                                                                                                   | Response |   |   |   |   |
|                                                                                                                                                                                                                                                                          |                                                                                                                                 | 1        | 2 | 3 | 4 | 5 |
| <b>U01</b>                                                                                                                                                                                                                                                               | Decision making to take action                                                                                                  |          |   |   |   |   |
| <b>U02</b>                                                                                                                                                                                                                                                               | Getting feedback from respective supervisors                                                                                    |          |   |   |   |   |
| <b>U03</b>                                                                                                                                                                                                                                                               | Monitoring day to day health service activities                                                                                 |          |   |   |   |   |
| <b>U04</b>                                                                                                                                                                                                                                                               | Presence of key indicators with charts or using HMIS materials                                                                  |          |   |   |   |   |
| <b>U05</b>                                                                                                                                                                                                                                                               | Checking data quality (using Lots Quality Assurance Score )(LQAS)                                                               |          |   |   |   |   |
| <b>U06</b>                                                                                                                                                                                                                                                               | Presentation of achievements of targets at the last health center and woreda team minutes for department performance evaluation |          |   |   |   |   |

**Observation Checklist**

| Name of Health Facility : _____ |                                                                                                                    |          |    |
|---------------------------------|--------------------------------------------------------------------------------------------------------------------|----------|----|
| Woreda( District): _____        |                                                                                                                    |          |    |
| Service Unit observed _____     |                                                                                                                    |          |    |
| Name of observer: _____         |                                                                                                                    |          |    |
| Date : ____/____/____           |                                                                                                                    |          |    |
| Code                            | Items to be checked                                                                                                | Verified |    |
|                                 |                                                                                                                    | Yes      | No |
| <b>Ch01</b>                     | Presence of health facility HIS* targets displayed                                                                 |          |    |
| <b>Ch02</b>                     | Presence of health facility indicator performance charts, graphs and table                                         |          |    |
| <b>Ch03</b>                     | displayed                                                                                                          |          |    |
| <b>Ch04</b>                     | Presence of staff meeting minutes reflecting reports, data and feedback from health facility or district discussed |          |    |
| <b>Ch05</b>                     | Presence of HIS training manual and guide                                                                          |          |    |
| <b>Ch06</b>                     | Presence of HIS supervisory checklist                                                                              |          |    |
| <b>Ch07</b>                     | Presence of HIS supervisory report                                                                                 |          |    |
| <b>Ch08</b>                     | Presence of data quality assurance checklist                                                                       |          |    |
| <b>Ch09</b>                     | Data collection correctly and completely filled by the health professionals                                        |          |    |
| <b>Ch10</b>                     | Change collected data into information and reported in the last three months                                       |          |    |

\*HIS: Health information system
